# Supplementary material for: Effect of High-Density Polyethylene Microplastics on the Survival and Development of Eastern Oyster (Crassostrea virginica) Larvae
Source: MDPI journal article supplement (doi:10.3390/ijerph20126142), 2023-06-16
Supplement: s1 [file s1]

**Table S1:** Survival rates of *C. virginica* after HDPE-MPs exposure in Cohort 1

| day | Treatment | Survival<br>rate |
|-----|-----------|------------------|
| 3   | control   | 64.83            |
| 3   | control   | 51.8             |
| 3   | mp        | 37               |
| 3   | mp        | 35               |
| 5   | control   | 19.96            |
| 5   | control   | 21.45            |
| 5   | mp        | 37.41            |
| 5   | mp        | 55.21            |
| 7   | control   | 57.1             |
| 7   | control   | 66.5             |
| 7   | mp        | 53.31            |
| 7   | mp        | 47.5             |
| 9   | control   | 3.78             |
| 9   | control   | 18.6             |
| 9   | mp        | 24.8             |
| 9   | mp        | 19.9             |

**Table S2:** Survival rates of *C. virginica* after HDPE-MPs exposure in Cohort 2

| day | Treatment | Survival<br>rate |
|-----|-----------|------------------|
| 4   | control   | 35.5             |
| 4   | control   | 31.2             |
| 4   | mp        | 31.2             |
| 4   | mp        | 32               |
| 9   | control   | 11.28            |
| 9   | control   | 15.38            |
| 9   | mp        | 8.55             |
| 9   | mp        | 8.33             |
| 11  | control   | 11               |
| 11  | control   | 18.33            |
| 11  | mp        | 0                |
| 11  | mp        | 0                |

**Table S3:** Survival rates of *C. virginica* after HDPE-MPs exposure in Cohort 3

| day | Treatment | Survival<br>rate |
|-----|-----------|------------------|
| 4   | control   | 76.87            |
| 4   | control   | 80.83            |
| 4   | mp        | 84.22            |
| 4   | mp        | 98.33            |
| 6   | control   | 38.83            |
| 6   | control   | 30.92            |
| 6   | mp        | 56.13            |
| 6   | mp        | 50.84            |
| 7   | control   | 39.75            |
| 7   | control   | 73.33            |
| 7   | mp        | 61.54            |
| 7   | mp        | 62.22            |
| 10  | control   | 16.98            |
| 10  | control   | 33.34            |
| 10  | mp        | 50               |
| 10  | mp        | 14.29            |
